# Supplementary material for: Efficacy and safety of low-dose IL-2 in the treatment of systemic lupus erythematosus: a randomised, double-blind, placebo-controlled trial
Source: HighWire-hosted journal article supplement (doi:10.1136/annrheumdis-2019-215396), 2019-09-19
Supplement: annrheumdis-2019-215396supp001_data_supplement.pdf [file annrheumdis-2019-215396supp001_data_supplement.pdf]

## Supplementary Materials

This appendix has been provided by the authors to give readers additional information about their work.

Supplement to: Jing H, Ruijun Z, Miao S, et al. Efficacy and safety of low-dose Interleukin-2 in the treatment of systemic lupus erythematosus: a randomised, double-blind, placebo-controlled trial.

## Table of Contents

|                                                                                                  |    |
|--------------------------------------------------------------------------------------------------|----|
| Impact of IL-2 therapy on NK cell activity .....                                                 | 3  |
| Figure S1. Representative gating of T cell and NK cell subsets.....                              | 4  |
| Figure S2. Immune cell subset dynamics during low-dose IL-2 treatment and follow-up.....         | 5  |
| Table S1. Baseline characteristics of SLE patients in trial NCT02465580 (n=60) .....             | 6  |
| Table S2. Baseline clinical characteristics of the enrolled patients with SLE in the study ..... | 7  |
| Table S3. Clinical responses to IL-2 or placebo treatment in patients with SLE .....             | 14 |
| Table S4. Responses of SLE patients to low-dose IL-2 treatment.....                              | 28 |
| Table S5 Laboratory Improvement in LN patients .....                                             | 30 |
| Table S6. Viral load in SLE with IL-2 treatment.....                                             | 31 |
| Table S7. Virus examined in sera of SLE patients by real-time PCR.....                           | 32 |
| Table S8. Antibodies used in flow cytometric analysis in this study .....                        | 33 |
| Table S9. Immune cell changes in SLE patients with low-dose IL-2 treatment .....                 | 34 |
| Table S10. Baseline characteristics of SLE patients in trial NCT02932137 (n=20)....              | 35 |
| Table S11. Phenotypic change of NK cells in SLE patients .....                                   | 35 |
| Table S12. Phenotype changes of CD8+ T cells in SLE patients .....                               | 36 |
| Table S13. SRI-4 changes in SLE patients.....                                                    | 36 |
| Table S14. SLEDAI score changes in SLE patients .....                                            | 37 |
| Table S15. LN complete remission rates in SLE patients.....                                      | 37 |
| Table S16. Proportions of patients achieving corticosteroid reduction by $\geq 50\%$ from        |    |

---

|                                                                                                |    |
|------------------------------------------------------------------------------------------------|----|
| baseline to 24 weeks .....                                                                     | 37 |
| Table S17. Changes of Albumin in SLE patients .....                                            | 38 |
| Table S18. Changes of proteinuria per 24 hours in SLE patients .....                           | 38 |
| Table S19. Proportions of patients with recovered C3 levels from baseline to 24 weeks<br>..... | 38 |
| Table S20. Proportions of patients with recovered C4 levels from baseline to 24 weeks<br>..... | 39 |
| Table S21. Changes of immune cell subsets.....                                                 | 40 |

---

### Impact of IL-2 therapy on NK cell activity

To verify the phenotypic changes of NK cells and CD8<sup>+</sup> T cells after IL-2 therapy, we compared the effects of low-dose IL-2 and conventional therapy on NK cell responses and representative virus-specific responses of CD8 T cells with another prospective, open-labelled study (NCT02932137). Ten patients receiving low-dose IL-2 therapy and ten with standard therapy consented for the evaluation of NK cells and CD8<sup>+</sup> T cells. Significant increase of IFN $\gamma$  ( $P=0.024$ ), NKp46 ( $P=0.025$ ) and NKG2D ( $P=0.003$ ) expression by NK cells were observed after low-dose IL-2 treatment, but not in patients receiving standard therapy (**Table S11**). However, we did not find any significant change in CD8<sup>+</sup> T cells after CEF peptide stimulation in IL-2 treated patients and patients under conventional therapy (**Supplementary Table S12**).

To further examine the impact of low-dose IL-2 on infections in SLE patients, 8 patients receiving low-dose IL-2 therapy consented to have their blood screened for infections (30 viruses, **Table S7**). One patient was positive for human papillomavirus and 2 were positive for BK virus at baseline (**Table S6**). The viral titres in patients were measured at week 2 and 10. Despite no anti-viral therapy, the viral loads of these 3 patients decreased to normal at week 10 with low-dose IL-2 treatment (**Table S4**).



**Figure S1. Representative gating of T cell and NK cell subsets**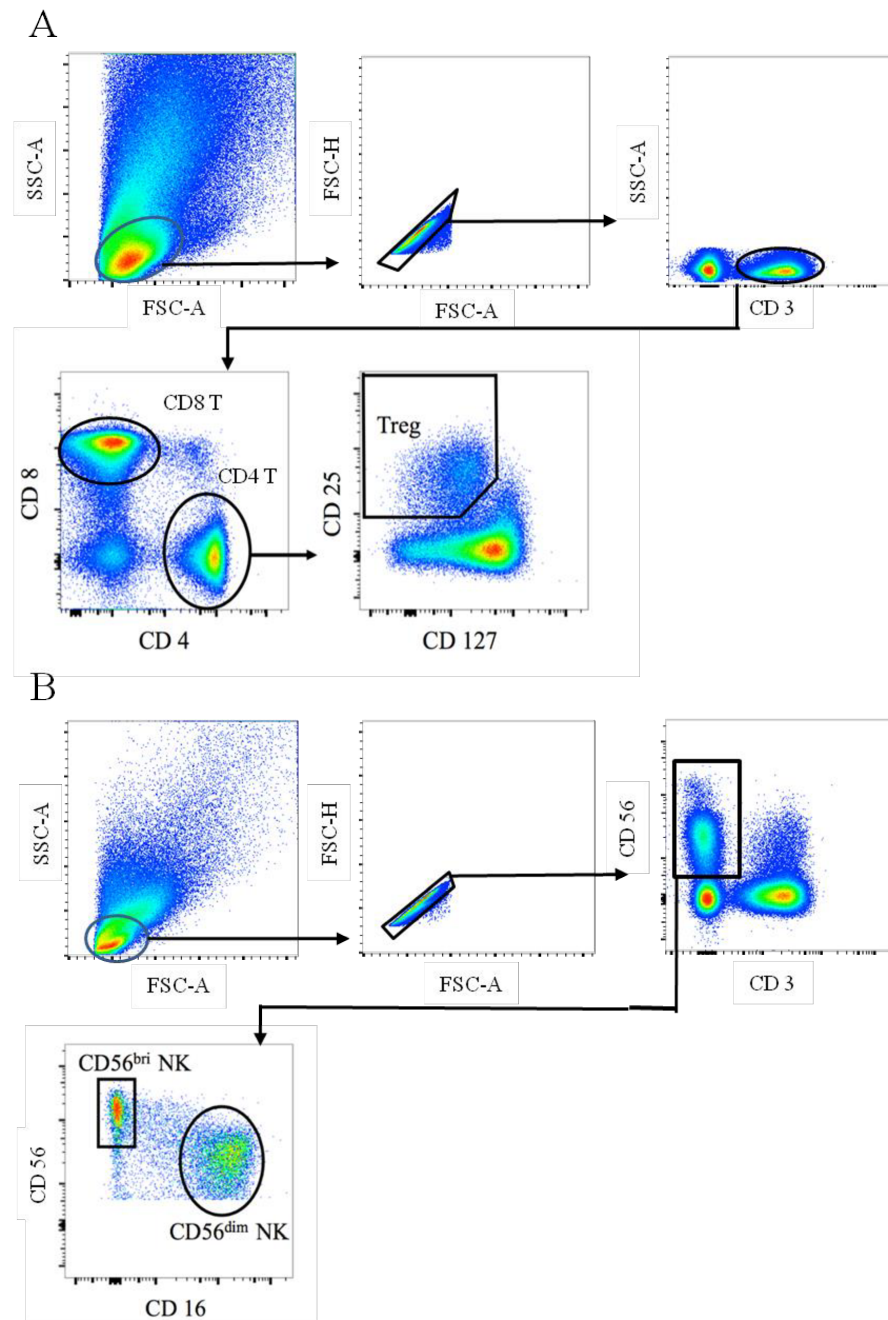

Panel A shows the gating of CD4<sup>+</sup>, CD8<sup>+</sup> and regulatory T cells. Panel B shows the gating of total NK cells (CD56<sup>+</sup>CD3<sup>1</sup>) and its CD56<sup>bri</sup>CD16<sup>-</sup> and CD56<sup>dim</sup>CD16<sup>+</sup> subsets.

Figure S2. Immune cell subset dynamics during low-dose IL-2 treatment and follow-up

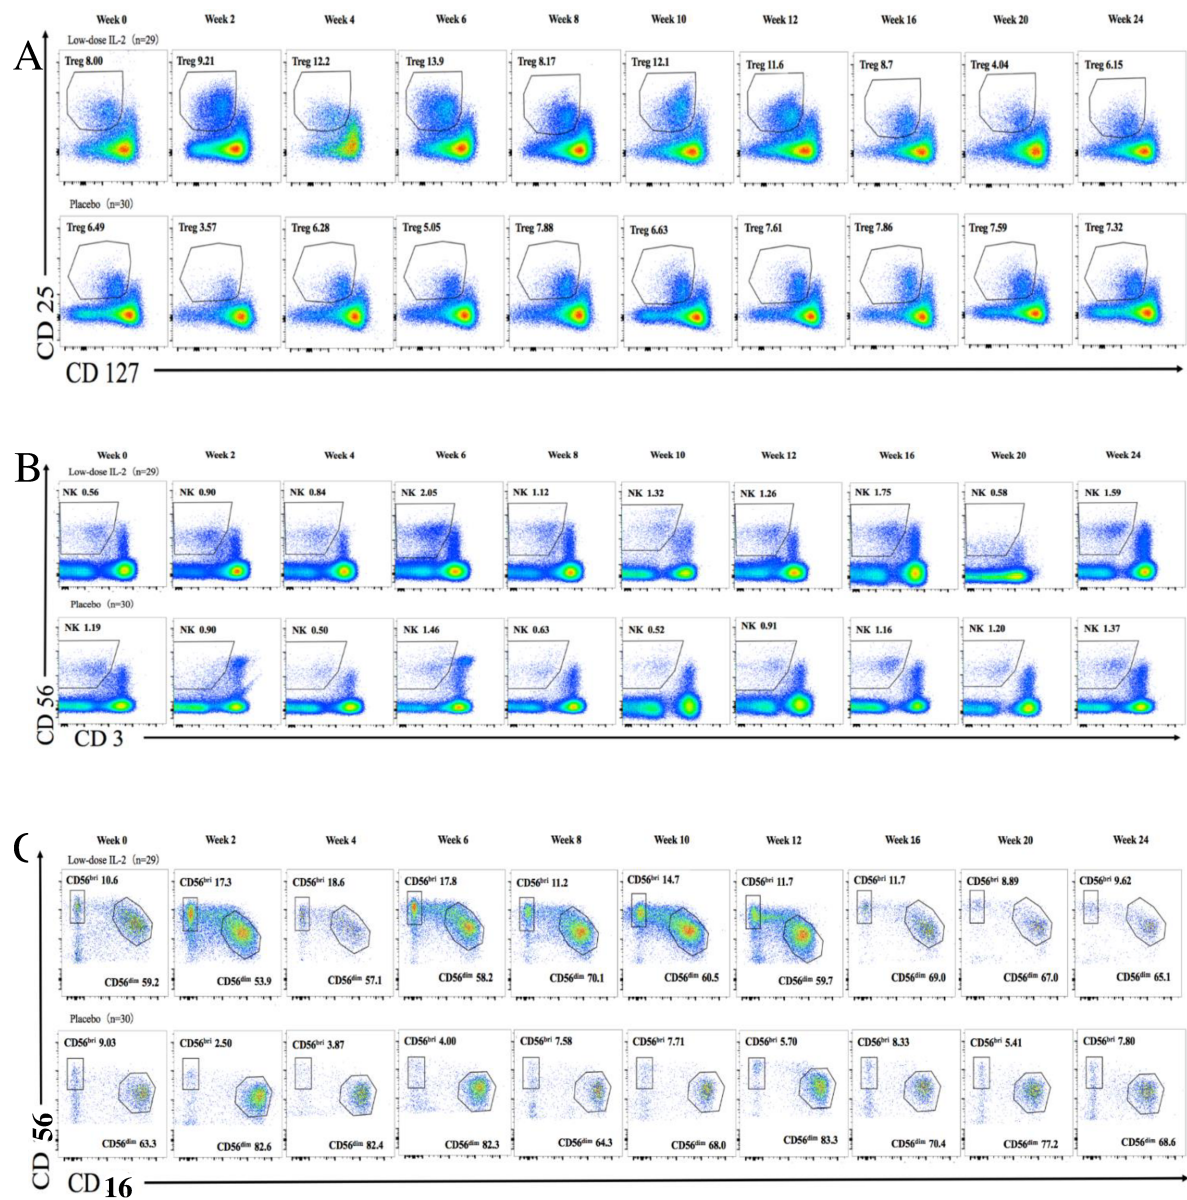

Panel A shows the changes of Treg cell at indicated time during the trial by flow cytometry in low-dose IL-2 group or placebo group. Panel B shows the changes of NK cells. Panel C shows the changes of CD56<sup>bri</sup> and CD56<sup>dim</sup> NK cell subsets. The detailed results were show in Table S7.

**Table S1. Baseline characteristics of SLE patients in trial  
NCT02465580 (n=60)**

| Characteristics                         | IL-2<br>(n=30)    | Placebo<br>(n=30) | P value |
|-----------------------------------------|-------------------|-------------------|---------|
| Age, year, mean $\pm$ SD                | 31.58 $\pm$ 9.25  | 29.83 $\pm$ 9.72  | 0.474   |
| Female/Male                             | 27/3              | 29/1              | 0.612   |
| Weight, kg, mean $\pm$ SD               | 54.81 $\pm$ 8.33  | 58.69 $\pm$ 8.87  | 0.117   |
| Height, cm, mean $\pm$ SD               | 162.23 $\pm$ 6.81 | 162.67 $\pm$ 5.41 | 0.743   |
| Area, m <sup>2</sup> , mean $\pm$ SD    | 1.57 $\pm$ 0.140  | 1.62 $\pm$ 0.13   | 0.708   |
| Duration, year, mean $\pm$ SD           | 66.7 $\pm$ 57.4   | 63.6 $\pm$ 59.9   | 0.652   |
| SLEDAI, median (range)                  | 12 (8, 27)        | 11 (8, 22)        | 0.351   |
| Medications                             |                   |                   |         |
| Prednisone dose, mg/day, median (range) | 12.5 (0, 50)      | 15 (5, 50)        | 0.331   |
| Hydroxychloroquine                      | 29 (96.67)        | 28 (93.33)        | 1.000   |
| Cyclophosphamide                        | 4 (13.33)         | 0 (0)             | 0.112   |
| Azathioprine                            | 1 (3.33)          | 4 (13.33)         | 0.352   |
| Cyclosporine                            | 0 (0)             | 5 (16.67)         | 0.052   |
| Mycophenolate Mofetil                   | 9 (30.00)         | 8 (26.67)         | 1.000   |
| Tacrolimus                              | 1 (3.33)          | 1 (3.33)          | 1.000   |
| Leflunomide                             | 3 (10.00)         | 1 (3.33)          | 0.611   |
| Thalidomide                             | 1 (3.33)          | 0 (0)             | 1.000   |
| Methotrexate                            | 1 (3.33)          | 1 (3.33)          | 1.000   |

\*For a continuous variable, median (range) and means  $\pm$ SD, for a categorical variable, count (percentage).

Table S2. Baseline clinical characteristics of the enrolled patients with SLE in the study

| ID    | Groups                      | Baseline |             |                         |                                      |                |                                     |                                 |             |                                    |                                |                                |                            |                                               |
|-------|-----------------------------|----------|-------------|-------------------------|--------------------------------------|----------------|-------------------------------------|---------------------------------|-------------|------------------------------------|--------------------------------|--------------------------------|----------------------------|-----------------------------------------------|
|       | 1=<br>IL-2<br>2=<br>Placebo | Sex      | A<br>g<br>e | Du<br>rati<br>on<br>(m) | Manifestations                       | SL<br>ED<br>AI | WB<br>C<br>(10 <sup>9</sup> /<br>L) | PLT<br>(10 <sup>9</sup> /<br>L) | A<br>N<br>A | Anti-dsD<br>NA<br>(<25.0<br>IU/ml) | C3<br>(0.790-<br>1.520g<br>/L) | C4<br>(0.160-<br>0.380g<br>/L) | Protei<br>nuria<br>(g/day) | Treatment                                     |
| SLE-1 | 1                           | F        | 26          | 156                     | LN, rash                             | 12             | 7.59                                | 318                             | 0           | 38.4                               | 0.794                          | 0.205                          | 1.34                       | Pred 10mg qd<br>HCQ 0.2g bid<br>FK506 1mg tid |
| SLE-2 | 2                           | F        | 22          | 1                       | Arthritis,<br>fever,myalgia          | 13             | 3.8                                 | 289                             | 640         | 132.1                              | 0.450                          | 0.050                          | 0.12                       | Pred 50mg qd<br>HCQ 0.2g bid                  |
| SLE-3 | 1                           | F        | 24          | 2                       | Arthritis, NPSLE,<br>fever, alopecia | 27             | 3.37                                | 186                             | 320         | 260.4                              | 0.307                          | 0.048                          | 0.09                       | Pred 50mg qd<br>HCQ 0.2g bid                  |
| SLE-4 | 2                           | F        | 24          | 9                       | Arthritis, rash,<br>LN               | 14             | 6.7                                 | 206                             | 640         | 321.4                              | 0.326                          | 0.034                          | 1.22                       | Pred 50mg qd<br>HCQ 0.2g bid                  |
| SLE-5 | 2                           | M        | 32          | 34                      | LN                                   | 10             | 5.1                                 | 142                             | 80          | 4.3                                | 0.711                          | 0.232                          | 6.54                       | Pred 7.5mg qd<br>HCQ 0.2g bid<br>AZA 50mg bid |
| SLE-6 | 1                           | F        | 58          | 29                      | Arthritis, rash,<br>alopecia         | 12             | 3.5                                 | 130                             | 640         | 35.6                               | 0.672                          | 0.102                          | 0.06                       | Pred 20mg qd<br>HCQ 0.2g bid                  |

|        |   |   |    |     |                                                 |    |       |     |     |        |       |       |      |                                                              |
|--------|---|---|----|-----|-------------------------------------------------|----|-------|-----|-----|--------|-------|-------|------|--------------------------------------------------------------|
|        |   |   |    |     |                                                 |    |       |     |     |        |       |       |      | Thal 50mg qn                                                 |
| SLE-7  | 2 | F | 43 | 196 | Arthritis, LN,<br>rash                          | 22 | 5.89  | 185 | 640 | 852.97 | 0.421 | 0.074 | 5.75 | Pred 50mg qd<br>HCQ 0.2g bid<br>MMF 0.5g bid<br>CsA 50mg tid |
| SLE-8  | 1 | F | 25 | 108 | Thrombocytopenia,<br>arthritis,<br>pericarditis | 9  | 12.18 | 91  | 160 | 14.9   | 0.712 | 0.164 | 0.07 | Pred 20mg qd<br>HCQ 0.20g bid<br>MMF 0.75g bid               |
| SLE-9  | 2 | F | 21 | 30  | Thrombocytopenia,<br>fever, rash,<br>arthritis  | 8  | 7.4   | 74  | 80  | 20.2   | 0.965 | 0.184 | 0.11 | Pred 7.5mg qd<br>HCQ 0.2g bid<br>CsA 75mg bid                |
| SLE-10 | 2 | F | 24 | 69  | Rash, LN                                        | 10 | 4.89  | 241 | 640 | 223.23 | 0.356 | 0.057 | 0.35 | Pred 30mg qd<br>HCQ 0.2g bid<br>AZA 50mg qd                  |
| SLE-11 | 1 | M | 28 | 84  | LN                                              | 16 | 5.08  | 215 | 320 | 2.6    | 0.806 | 0.416 | 2.14 | Pred 10mg qd<br>HCQ 0.2g bid<br>CTX 0.4g q2w                 |
| SLE-12 | 1 | F | 34 | 39  | Arthritis, myositis,<br>fever, rash             | 15 | 5     | 210 | 320 | 60.7   | 0.513 | 0.08  | 0.12 | Pred 30mg qd<br>HCQ 0.2g bid<br>MMF 0.5g bid                 |
| SLE-13 | 2 | F | 38 | 2   | Alopecia, arthritis                             | 8  | 8.28  | 239 | 320 | 1      | 0.718 | 0.169 | 0.13 | Pred 50mg qd<br>CsA 50mg bid<br>HCQ 0.2g bid                 |
| SLE-14 | 2 | F | 28 | 32  | Arthritis,<br>oral ulcer                        | 8  | 4.18  | 324 | 0   | 7.7    | 0.928 | 0.152 | —    | Pred 15mg qd<br>HCQ 0.2g bid                                 |
| SLE-15 | 1 | F | 29 | 14  | Vasculitis<br>oral ulcer                        | 16 | 5.59  | 323 | 160 | 162.8  | 0.836 | 0.086 | 0.04 | Pred 25mg qd<br>HCQ 0.2g bid                                 |

|        |   |   |    |     |                                                |    |       |     |     |         |       |       |      |                                               |
|--------|---|---|----|-----|------------------------------------------------|----|-------|-----|-----|---------|-------|-------|------|-----------------------------------------------|
|        |   |   |    |     |                                                |    |       |     |     |         |       |       |      | MMF 1g bid                                    |
| SLE-16 | 1 | F | 39 | 36  | arthritis, alopecia,<br>rash, oral ulcer       | 10 |       |     | 160 | 1.0     | 0.943 | 0.176 | —    | Pred 10mg qd<br>HCQ 0.2g bid                  |
| SLE-17 | 2 | F | 23 | 96  | LN, rash,<br>NPSLE,<br>thrombocytopenia        | 15 | 13.12 | 93  |     | 164     | 0.514 | 0.074 | 2.61 | Pred 10mg qd<br>FK506 1g bid<br>AZA 50mg qd   |
| SLE-18 | 1 | F | 35 | 123 | Alopecia, rash,<br>arthritis                   | 10 | 4.85  | 383 |     | 22.6    | 0.701 | 0.157 | 0.12 | Pred 5mg qd<br>HCQ 0.2g bid                   |
| SLE-19 | 2 | F | 47 | 144 | Proteinuria,<br>rash                           | 8  | 5     | 170 | 640 | 46      | 1.25  | 0.208 | 1.42 | Pred 10mg qd<br>HCQ 0.2g bid<br>MMF 1g bid    |
| SLE-20 | 1 | F | 22 | 90  | LN                                             | 12 | 3.17  | 181 | 320 | 1783.15 | 0.735 | 0.092 | 1.8  | Pred 17.5mg qd<br>CTX 0.4g q2w                |
| SLE-21 | 2 | F | 24 | 123 | LN                                             | 12 | 3.47  | 239 | 320 | 129.2   | 0.431 | 0.106 | 1.63 | Pred 7.5mg qd<br>HCQ 0.2g bid                 |
| SLE-22 | 1 | F | 21 | 60  | Rash, fever,<br>thrombocytopeni,<br>leukopenia | 9  | 1.7   | 58  | 80  | 30.9    | 1.02  | 0.153 | 0.13 | Pred 50mg qd<br>HCQ 0.2g bid<br>CTX 0.4g q2w  |
| SLE-23 | 2 | F | 26 | 42  | Arthritis, rash,<br>leukopenia                 | 11 | 2.91  | 144 | 0   | 58.5    | 0.502 | 0.094 | 0.12 | Pred 5mg qd<br>HCQ 0.2g bid<br>LEF 10mg bid   |
| SLE-24 | 1 | F | 41 | 55  | Proteinuria,<br>arthritis,<br>rash             | 16 | 5.12  | 205 | 320 | 28.4    | 1.080 | 0.163 | 1.17 | Pred 15mg qd<br>HCQ 0.2g bid<br>MMF 0.75g bid |
| SLE-25 | 2 | F | 19 | 0   | Thrombocytopenia,<br>rash, fever               | 8  | 9.3   | 69  | 640 | 37.4    | 0.722 | 0.067 | 0.15 | Pred 50mg qd<br>HCQ 0.2g bid<br>MMF 0.5g bid  |

|        |   |   |    |     |                                                            |    |       |     |     |        |       |       |      |                                               |
|--------|---|---|----|-----|------------------------------------------------------------|----|-------|-----|-----|--------|-------|-------|------|-----------------------------------------------|
| SLE-26 | 1 | F | 32 | 99  | Rash,<br>oral ulcer                                        | 8  | 3.59  | 199 | 320 | 74.3   | 0.739 | 0.214 | 0.06 | Pred 10mg qd<br>HCQ 0.2g bid<br>MMF 0.75g bid |
| SLE-27 | 1 | F | 26 | 25  | Proteinuria,<br>arthritis,<br>rash                         | 10 | 8.92  | 207 | 320 | 17     | 1.470 | 0.272 | 1.79 | Pred 12.5mg qd<br>HCQ 0.2g bid<br>CTX 0.6 q2w |
| SLE-28 | 2 | F | 53 | 10  | Thrombocytopenia,<br>arthritis,                            | 9  | 8.5   | 60  | 80  | 33.5   | 0.913 | 0.120 | 0.06 | Pred 10mg qd<br>HCQ 0.2g bid                  |
| SLE-29 | 1 | F | 26 | 168 | LN                                                         | 20 | 4.3   | 168 | 640 | 436.82 | 0.502 | 0.094 | 1.4  | Pred 50mg qd<br>MMF 0.75g bid<br>HCQ 0.2g bid |
| SLE-30 | 1 | F | 27 | 72  | LN                                                         | 12 | 13.33 | 280 | 640 | 42.4   | 1.220 | 0.197 | 1.44 | Pred 30mg qd<br>MMF 0.25g bid<br>HCQ 0.2g bid |
| SLE-31 | 2 | F | 48 | 0.5 | Arthritis,<br>headache,<br>thrombocytopenia,<br>leucopenia | 18 | 2.0   | 83  | 640 | 189.46 | 0.280 | 0.038 | —    | Pred 50mg qd<br>MMF 0.5g bid<br>HCQ 0.2g bid  |
| SLE-32 | 2 | F | 31 | 42  | Rash,<br>Alopecia                                          | 8  | 6.2   | 282 | 640 | 436.34 | 0.667 | 0.062 | 0.06 | Pred 7.5mg qd<br>HCQ 0.2g bid                 |
| SLE-33 | 1 | F | 51 | 126 | LN                                                         | 10 | 4.45  | 199 | 80  | 342.68 | 0.807 | 0.191 | 0.36 | Pred 5mg qd<br>HCQ 0.2g bid<br>LEF 20mg qd    |
| SLE-34 | 2 | F | 31 | 1   | Arthritis,<br>alopecia,<br>fever                           | 11 | 11.2  | 208 | 640 | 84     | 0.627 | 0.102 | 0.1  | Pred 45mg qd<br>HCQ 0.2g bid<br>CsA 25mg tid  |
| SLE-35 | 2 | F | 21 | 49  | Arthritis,                                                 | 9  | 5.86  | 96  | 640 | 1.0    | 0.863 | 0.176 | —    | Pred 15mg qd                                  |

|        |   |   |    |     |                                                         |    |       |     |     |         |       |       |      |                                              |
|--------|---|---|----|-----|---------------------------------------------------------|----|-------|-----|-----|---------|-------|-------|------|----------------------------------------------|
|        |   |   |    |     | rash, alopecia,<br>thrombocytopenia,                    |    |       |     |     |         |       |       |      | HCQ 0.2g bid                                 |
| SLE-36 | 1 | F | 24 | 3   | Alopecia,<br>LN                                         | 14 | 5.03  | 144 | 320 | 37.7    | 0.666 | 0.103 | 0.1  | Pred 30mg qd<br>HCQ 0.2g bid<br>LEF 10mg bid |
| SLE-37 | 1 | F | 48 | 1   | Alopecia, arthritis<br>vasculitis,<br>thrombocytopenia. | 21 | 5.2   | 84  | 320 | 148.37  | 0.375 | 0.040 | 1.8  | Pred 50mg qd<br>HCQ 0.2 bid                  |
| SLE-38 | 2 | F | 28 | 32  | Thrombocytopenia,<br>alopecia,<br>hematuria             | 11 | 13.82 | 4   | 640 | 103.4   | 0.284 | 0.025 | —    | Pred 50mg qd<br>CsA 25mg bid<br>HCQ 0.2 bid  |
| SLE-39 | 2 | F | 41 | 8   | Arthritis,<br>rash                                      | 8  | 4.62  | 221 | 320 | 146.2   | 0.91  | 0.149 | 0.13 | Pred 45mg qd<br>HCQ 0.2 bid                  |
| SLE-40 | 1 | M | 34 | 4   | Discoid rash ,<br>arthritis                             | 8  | 4.34  | 233 | 320 | 43.9    | 1.030 | 0.211 | 0.16 | MTX 10mg qw<br>HCQ 0.2 bid                   |
| SLE-41 | 1 | F | 38 | 1   | Vasculitis                                              | 12 | 6.5   | 221 | 320 | 465.78  | 0.447 | 0.127 | 0.33 | Pred 50mg qd<br>MMF 50mg bid<br>HCQ 0.2g bid |
| SLE-42 | 1 | F | 27 | 40  | Rash, alopecia                                          | 8  | 5.43  | 253 | 160 | 1.0     | 1.040 | 0.200 | 0.06 | Pred 5mg qd<br>HCQ 0.2g bid                  |
| SLE-43 | 2 | F | 25 | 204 | LN                                                      | 12 | 4.33  | 345 | 320 | 25.8    | 0.535 | 0.193 | 1.47 |                                              |
| SLE-44 | 2 | F | 20 | 5   | LN                                                      | 12 | 9.02  | 338 | 320 | 2525.53 | 0.563 | 0.017 | 0.27 | Pred 15mg qd<br>HCQ 0.2g bid<br>MTX 10mg qw  |
| SLE-45 | 2 | F | 23 | 46  | Rash, arthritis                                         | 10 | 4.2   | 149 | 320 | 2460.8  | 0.563 | 0.017 | 0.05 | Pred 10mg qd<br>HCQ 0.2g bid                 |



|        |   |   |    |     |                                                   |    |      |     |     |        |       |       |      |                                               |
|--------|---|---|----|-----|---------------------------------------------------|----|------|-----|-----|--------|-------|-------|------|-----------------------------------------------|
|        |   |   |    |     |                                                   |    |      |     |     |        |       |       |      | MMF 0.25g tid                                 |
| SLE-46 | 1 | F | 28 | 240 | LN                                                | 12 | 6.3  | 202 | 640 | 32.8   | 0.781 | 0.225 | 7.36 | Pred 10mg qd<br>MMF 1.0g bid<br>HCQ 0.2 bid   |
| SLE-47 | 2 | F | 32 | 52  | LN, rash                                          | 8  | 5.09 | 161 | 320 | 19.8   | 0.640 | 0.158 | 2.54 | Pred 27.5mg qd<br>HCQ 0.2g bid                |
| SLE-48 | 1 | F | 37 | 40  | Arthritis, alopecia ,LN                           | 12 | 6.99 | 163 | 320 | 23.5   | 0.704 | 0.142 | 0.4  | Pred 10mg qd<br>HCQ 0.2g bid<br>AZA 100mg qd  |
| SLE-49 | 2 | F | 21 | 120 | Alopecia, vasculitis                              | 12 | 5.22 | 224 | 320 | 394.98 | 0.829 | 0.179 | 0.12 | Pred 40mg qd<br>HCQ 0.2g bid<br>MMF 0.75g bid |
| SLE-50 | 2 | F | 25 | 56  | Arthritis, myositis                               | 12 | 6.39 | 162 | 320 | 73.3   | 0.767 | 0.103 | 0.11 | Pred 10mg qd<br>HCQ 0.2g bid                  |
| SLE-51 | 1 | F | 23 | 5   | Alopecia, hematuria                               | 10 | 8.77 | 267 | 160 | 29.6   | 0.720 | 0.104 | 0.19 | Pred 20mg qd<br>HCQ 0.2g bid                  |
| SLE-52 | 1 | F | 46 | 10  | Arthritis,<br>oral ulcers,<br>thrombocytopenia    | 9  | 6.42 | 62  | 80  | 6.2    | 0.989 | 0.147 | —    | Pred 10mg qd<br>HCQ 0.2g bid                  |
| SLE-53 | 1 | M | 18 | 30  | Thrombocytopenia,<br>rash, arthritis,<br>alopecia | 13 | 4.97 | 1   | 320 | 34.8   | 0.616 | 0.123 | —    | HCQ 0.2g bid                                  |
| SLE-54 | 1 | F | 59 | 235 | Thrombocytopenia,<br>rash, LN                     | 11 | 4.18 | 68  | 640 | 6.4    | 1.090 | 0.343 | 0.39 | Pred 10mg qd<br>HCQ 0.2g bid                  |
| SLE-55 | 2 | F | 30 | 50  | LN,<br>vasculitis                                 | 18 | 3.64 | 283 | 320 | 10.5   | 0.536 | 0.101 | 4.48 | Pred 10mg qd<br>HCQ 0.2g bid<br>AZA 75mg qd   |

|        |   |   |    |     |                              |    |       |     |     |       |       |       |      |                                              |
|--------|---|---|----|-----|------------------------------|----|-------|-----|-----|-------|-------|-------|------|----------------------------------------------|
| SLE-56 | 2 | F | 55 | 0   | Arthritis,<br>myositis, rash | 12 | 12.56 | 256 | 40  | 44.3  | 1.140 | 0.225 | 0.37 | Pred 15mg qd<br>HCQ 0.2g bid                 |
| SLE-57 | 2 | F | 32 | 135 | LN,<br>alopecia,<br>rash     | 10 | 8.02  | 110 | 320 | 119.8 | 0.922 | 0.268 | 0.64 | Pred 10mg qd<br>HCQ 0.2g bid<br>MMF 0.5g bid |
| SLE-58 | 1 | F | 30 | 39  | Vasculitis,<br>alopecia      | 14 | 3.91  | 239 | 640 | 25.4  | 2.250 | 0.158 | 0.46 | Pred 10mg qd<br>HCQ 0.2 bid<br>LEF 10mg bid  |
| SLE-59 | 2 | F | 31 | 110 | Headache,<br>rash            | 12 | 3.8   | 159 | 80  | 1.0   | 0.564 | 0.056 | 0.3  | Pred 50mg qd<br>HCQ 0.2g bid<br>MMF 0.5g bid |
| SLE-60 | 1 | F | 27 | 16  | Alopecia,<br>arthritis       | 8  | 4.87  | 196 | 320 | 15.5  | 0.789 | 0.129 | 0.06 | Pred 10mg qd<br>HCQ 0.2g bid                 |

**Table S3. Clinical responses to IL-2 or placebo treatment in patients with SLE**

| <b>ID</b> | <b>Groups<br/>(1=<br/>IL-2<br/>2=<br/>Placebo)</b> | <b>Clinical Responses</b>                     | <b>SLEDAI<br/>changes Pre<br/>and Post<br/>therapy</b> | <b>Response description</b>                                                                                                                                                                                                                                                                                                                                                                                     | <b>Description of<br/>adverse effects</b> |
|-----------|----------------------------------------------------|-----------------------------------------------|--------------------------------------------------------|-----------------------------------------------------------------------------------------------------------------------------------------------------------------------------------------------------------------------------------------------------------------------------------------------------------------------------------------------------------------------------------------------------------------|-------------------------------------------|
| SLE-1     | 1                                                  | Remission in proteinuria and rash             | 12-2=10                                                | 1. Rash resolved after week 6.<br>2. Renal variables: 24h-UPE decreased from 1.339 to 0.27 g/day after three courses of treatment.<br>3. Immune variables:<br>anti-dsDNA antibodies decreased from 38.4 to 34.9 IU/mL, C3 increased from 0.794 to 0.863 g/L; C4 increased from 0.205 to 0.256 g/L after three courses of treatment.                                                                             | Injection site reactions                  |
| SLE-2     | 2                                                  | Remission in fever<br><br>Withdrew at week 16 | 13-8=5                                                 | 1. Fever reduced to normal after week 2.<br>2. More swollen joints after treatment.<br>3. Immune variables:<br>anti-dsDNA antibodies decreased from 132.1 to 47.7 IU/mL, C3 increased from 0.450 to 0.942 g/L; C4 increased from 0.05 to 0.149 g/L.                                                                                                                                                             | None                                      |
| SLE-3     | 1                                                  | Remission in fever and NPSLE                  | 27-14=13                                               | 1. Fever reduced to normal after week 2 and NPSLE was controlled after three courses of treatment.<br>2. More hurt joints and alopecia after three courses of treatment.<br>3. Renal variables: 24h-UPE increased from 0.09 to 0.47g/day; RBC increased from 10 to 1072/ml; serum albumin increased from 29.4 to 41.5g/L.<br>4. Immune variables:<br>anti-dsDNA antibodies decreased from 260.4 to 111.1 IU/mL; | None                                      |

|       |   |                                                                      |         |                                                                                                                                                                                                                                                                                                                                                                          |                             |
|-------|---|----------------------------------------------------------------------|---------|--------------------------------------------------------------------------------------------------------------------------------------------------------------------------------------------------------------------------------------------------------------------------------------------------------------------------------------------------------------------------|-----------------------------|
|       |   |                                                                      |         | anti-Rib-p antibodies decreased from 217.79 to 57.09 IU/mL; C3 increased from 0.307 to 0.681 g/L; C4 increased from 0.048 to 0.142 g/L after three courses of treatment.                                                                                                                                                                                                 |                             |
| SLE-4 | 2 | No remission in arthritis, rash and LN                               | 14-14=0 | 1. More swollen/hurt joints and rash after three courses of treatment.<br>2. Renal variables: 24h-UPE increased from 1.22 to 2.87g/day; WBC increased from 0 to 89/□l; RBC decreased from 50 to 23/□l.<br>3. Immune variables:<br>anti-dsDNA antibodies decreased from 321.4 to 124.6 IU/mL; C3 increased from 0.326 to 0.708 g/L; C4 increased from 0.034 to 0.101 g/L. | None                        |
| SLE-5 | 2 | Partial remission in proteinuria                                     | 10-6=4  | 1. Renal variables: 24h-UPE decreased from 6.54 to 2.15g/day; RBC decreased from 72 to 2/□l; serum albumin changed from 35.4 to 40.1 g/L.<br>2. Immune variables:<br>anti-dsDNA antibodies changed from 4.3 to 8.7 IU/mL; anti-Rib-p antibodies decreased from 217.79 to 57.09 IU/mL; C3 decreased from 0.711 to 0.625 g/L; C4 increased from 0.232 to 0.255 g/L.        | Upper respiratory infection |
| SLE-6 | 1 | Remission in arthritis, rash and alopecia<br><br>Withdrew at week 16 | 12-4=8  | 1. Rash and arthritis resolved after 1 course; alopecia improved after week 8.<br>2. Immune variables:<br>anti-dsDNA antibodies increased from 35.6 to 58.3 IU/mL; C3 increased from 0.672 to 0.787 g/L; C4 increased from 0.102 to 0.156 g/L after three courses of treatment.                                                                                          | None                        |
| SLE-7 | 2 | Remission in arthritis and proteinuria                               | 22-16=6 | 1. Arthritis relieved after week 16.<br>2. Renal variables: 24h-UPE decreased from 5.75 to 2.71g/day; WBC decreased from 433 to 50/□L; RBC changed from 104 to 104/□L<br>serum albumin increased from 25.1 to 31.9 g/L.                                                                                                                                                  | None                        |

|        |   |                                                                 |           |                                                                                                                                                                                                                                                                                                                                            |       |
|--------|---|-----------------------------------------------------------------|-----------|--------------------------------------------------------------------------------------------------------------------------------------------------------------------------------------------------------------------------------------------------------------------------------------------------------------------------------------------|-------|
|        |   |                                                                 |           | 3. Immunevariables:<br>anti-dsDNA antibodies decreased from 852.97 to 205.82 IU/mL;<br>anti-Rib-p antibodies decreased from 36.73 to 15.03 IU/mL; C3<br>decreased from 0.421 to 0.478 g/L; C4 increased from 0.074 to 0.093<br>g/L.                                                                                                        |       |
| SLE-8  | 1 | Remission in<br>thrombocytopenia, arthritis<br>and pericarditis | 9-0=9     | 1. Pericarditis improved after week 6 and arthritis relieved after week<br>10.<br>2. PLT increased from 96 to 124×10 <sup>9</sup> /L.<br>3. Immune variables:<br>anti-dsDNA antibodies changed from 14.9 to 16.2 IU/mL, C3<br>increased from 0.712 to 0.841 g/L; C4 increased from 0.164 to 0.179<br>g/L after three courses of treatment. | None  |
| SLE-9  | 2 | Remission in<br>thrombocytopenia, fever, rash<br>and arthritis  | 8-0=8     | 1. Rash disappeared and fever reduced to normal after week 2; arthritis<br>relieved after week 8.<br>2. PLT increased from 76 to 135×10 <sup>7</sup> /ml after week 10.<br>3. Immune variables:<br>anti-dsDNA antibodies changed from 20.2 to 19.9 IU/mL, C3 changed<br>from 0.965 to 0.893 g/L; C4 increased from 0.184 to 0.202 g/L.     | None  |
| SLE-10 | 2 | Withdrew at week 8                                              | 10-21=-11 | 1. Rash did not improved after treatment.<br>2. Developed to NPSLE and fever at week 8<br>3. Renal variables: 24h-UPE increased from 0.35 to 0.41g/day.<br>4.WBC decreased from 4.89 to 2.8×10 <sup>9</sup> /L; PLT decreased from 241 to<br>100×10 <sup>9</sup> /L.                                                                       | NPSLE |
| SLE-11 | 1 | Remission in proteinuria                                        | 16-16=0   | 1.Renal variables: 24h-UPE decreased from 2.14 to 1.02g/day; WBC<br>decreased from 42 to 27/□L; RBC decreased from 21 to 25/□L;                                                                                                                                                                                                            | None  |

|        |   |                                               |         |                                                                                                                                                                                                                                                                                                                                               |                          |
|--------|---|-----------------------------------------------|---------|-----------------------------------------------------------------------------------------------------------------------------------------------------------------------------------------------------------------------------------------------------------------------------------------------------------------------------------------------|--------------------------|
|        |   |                                               |         | granular cast decreased from 10 to 6; serum albumin changed from 41.7 to 42.4 g/L after three courses of treatment.<br>2. Immune variables:<br>anti-dsDNA antibodies changed from 2.6 to 6.8 IU/mL; C3 changed from 0.806 to 0.790 g/L; C4 changed from 0.416 to 0.289 g/L after three courses of treatment.                                  |                          |
| SLE-12 | 1 | Remission in arthritis, fever, rash, myositis | 15-4=11 | 1. Fever reduced to normal after week 2; arthritis and myositis improved after week 8; rash disappeared after week 12.<br>2. Immune variables:<br>anti-dsDNA antibodies changed from 60.7 to 59 IU/mL, C3 changed from 0.513 to 0.0882 g/L; C4 increased from 0.080 to 0.139 g/L after three courses of treatment.                            | None                     |
| SLE-13 | 2 | Remission in alopecia and arthritis           | 8-2=6   | 1. Alopecia resolved after week 2; arthritis relieved after week 6.<br>2. Immune variables:<br>anti-dsDNA antibodies changed from 1 to 6.5 IU/mL, C3 increased from 0.718 to 0.842 g/L; C4 decreased from 0.169 to 0.148 g/L.                                                                                                                 | Herpes zoster            |
| SLE-14 | 2 | Remission in arthritis and oral ulcer         | 8-2=6   | 1. Oral ulcer recovered after week 4; arthritis relieved after week 6.<br>2. Immune variables:<br>anti-dsDNA antibodies changed from 7.7 to 9.4 IU/mL, C3 changed from 0.928 to 1.040 g/L; C4 changed from 0.152 to 0.164 g/L.                                                                                                                | None                     |
| SLE-15 | 1 | Remission in vasculitis and oral ulcer        | 16-4=12 | 1. Oral ulcer recovered after week 2; fingertip vasculitis improved after week 6.<br>2. Immune variables:<br>anti-dsDNA antibodies decreased from 162.8 to 36.45 IU/mL, anti-Rib-p antibodies decreased from 319.89 to 273.65 IU/mL; C3 changed from 0.836 to 0.985 g/L; C4 changed from 0.086 to 0.108 g/L after three courses of treatment. | Injection site reactions |

|        |   |                                                                     |         |                                                                                                                                                                                                                                                                                                                                                                                                                                                     |                                                          |
|--------|---|---------------------------------------------------------------------|---------|-----------------------------------------------------------------------------------------------------------------------------------------------------------------------------------------------------------------------------------------------------------------------------------------------------------------------------------------------------------------------------------------------------------------------------------------------------|----------------------------------------------------------|
| SLE-16 | 1 | Withdrew at week 2                                                  | —       | Without using study drug.                                                                                                                                                                                                                                                                                                                                                                                                                           |                                                          |
| SLE-17 | 2 | Remission in thrombocytopenia and rash, no remission in proteinuria | 15-12=3 | <p>1. Rash resolved after week 4.</p> <p>2. PLT increased from 93 to <math>167 \times 10^9/L</math>.</p> <p>3. Renal variables: 24h-UPE increased from 2.61 to 4.98g/day; WBC decreased from 48 to <math>33/\square L</math>; serum albumin decreased from 41.5 to 37.6g/L.</p> <p>4. Immune variables:<br/>anti-dsDNA antibodies decreased from 164 to 80.9 IU/mL; C3 decreased from 0.514 to 0.553 g/L; C4 decreased from 0.074 to 0.060 g/L.</p> | None                                                     |
| SLE-18 | 1 | Remission in rash, alopecia and arthritis                           | 10-4=6  | <p>1. Arthritis relieved after week 2; rash and alopecia improved after week 4.</p> <p>2. Immune variables:<br/>anti-dsDNA antibodies increased from 22.6 to 31.4 IU/mL; C3 increased from 0.701 to 0.765 g/L; C4 increased from 0.157 to 0.177 g/L after three courses of treatment.</p>                                                                                                                                                           | Flu-like symptoms                                        |
| SLE-19 | 2 | Remission in proteinuria and rash                                   | 8-6=2   | <p>1. Rash resolved after week 2.</p> <p>2. Renal variables: 24h-UPE decreased from 1.42 to 1.38g/day.</p> <p>3. Immune variables:<br/>anti-dsDNA antibodies decreased from 46 to 27.6 IU/mL; C3 changed from 1.250 to 1.020 g/L; C4 changed from 0.208 to 0.161 g/L.</p>                                                                                                                                                                           | Injection site reactions;<br>Upper respiratory infection |
| SLE-20 | 1 | Remissive in proteinuria                                            | 12-12=0 | <p>1. Renal variables: 24h-UPE decreased from 1.80 to 1.33g/day; WBC changed from 32 to <math>43/\square L</math> after three courses of treatment.</p> <p>3. Immune variables:<br/>anti-dsDNA antibodies decreased from 1783.15 to 876.21 IU/mL; C3 decreased from 0.735 to 0.477 g/L; C4 changed from 0.092 to 0.055 g/L after three courses of treatment.</p>                                                                                    | Flu-like symptoms                                        |

|        |   |                                                           |         |                                                                                                                                                                                                                                                                                                                                                                                                                                                                          |                                                          |
|--------|---|-----------------------------------------------------------|---------|--------------------------------------------------------------------------------------------------------------------------------------------------------------------------------------------------------------------------------------------------------------------------------------------------------------------------------------------------------------------------------------------------------------------------------------------------------------------------|----------------------------------------------------------|
| SLE-21 | 2 | No remission in proteinuria                               | 12-12=0 | <p>1. Renal variables: 24h-UPE increased from 1.63g/day to 7.89g/day; WBC changed from 70 to 432/<math>\square</math>L.</p> <p>3. Immune variables:<br/>anti-dsDNA antibodies decreased from 129.2 to 50.2 IU/mL; C3 increased from 0.431 to 0.649 g/L; C4 increased from 0.106 to 0.134 g/L.</p>                                                                                                                                                                        | None                                                     |
| SLE-22 | 1 | Remission in rash, fever, thrombocytopenia and leukopenia | 9-4=5   | <p>1. Fever reduced to normal after week 2; rash disappeared after week 4.</p> <p>2. Hematological variables: WBC increased from 1.7 to <math>6.67 \times 10^9</math>/ml; PLT increased from 58 to <math>102 \times 10^9</math>/ml after one course of treatment.</p> <p>3. Immune variables:<br/>anti-dsDNA antibodies increased from 30.9 to 37.8 IU/mL; C3 changed from 1.02 to 0.847 g/L; C4 decreased from 0.153 to 0.147 g/L after three courses of treatment.</p> | Upper respiratory infection                              |
| SLE-23 | 2 | Remission in arthritis<br><br>Withdrew at week 12         | 11-4=7  | <p>1. Arthritis relieved after week 6.</p> <p>2. Hematological variables: WBC increased from 2.89 to <math>3.67 \times 10^9</math>/ml.</p> <p>3. Immune variables:<br/>anti-dsDNA antibodies increased from 58.5 to 37.6 IU/mL; C3 changed from 0.502 to 0.872 g/L; C4 decreased from 0.094 to 0.137 g/L after three courses of treatment.</p>                                                                                                                           | None                                                     |
| SLE-24 | 1 | Remission in proteinuria, arthritis and rash              | 16-4=12 | <p>1. Remission of arthritis and rash after week 2, remission of proteinuria after week 24.</p> <p>2. Renal variables: 24h-UPE decreased from 1.17 to 0.38g/day; RBC changed from 102 to 20/<math>\square</math>L. after week 24.</p> <p>3. Immune variables:<br/>anti-dsDNA antibodies decreased from 28.4 to 15.3 IU/mL; C3</p>                                                                                                                                        | Injection site reactions;<br>Upper respiratory infection |



|        |   |                                  |         |                                                                                                                                                                                                                                                                                                                                            |                                              |
|--------|---|----------------------------------|---------|--------------------------------------------------------------------------------------------------------------------------------------------------------------------------------------------------------------------------------------------------------------------------------------------------------------------------------------------|----------------------------------------------|
|        |   |                                  |         | changed from 1.080 to 1.160 g/L; C4 changed from 0.163 to 0.163 g/L after three courses of treatment.                                                                                                                                                                                                                                      |                                              |
| SLE-25 | 2 | Remission in rash and fever      | 8-4=4   | <p>1. Rash improved and fever reduced to normal after week 2.</p> <p>2. Hematological variables: PLT increased from 118 to <math>267 \times 10^9/\text{ml}</math>.</p> <p>3. Immune variables:<br/>anti-dsDNA antibodies decreased from 37.4 to 3.6 IU/mL; C3 increased from 0.722 to 0.885 g/L; C4 changed from 0.067 to 0.180 g/L.</p>   | Pneumonia                                    |
| SLE-26 | 1 | Remission in rash and oral ulcer | 8-4=4   | <p>1. Rash and oral ulcer improved after week 4.</p> <p>2. Immune variables:<br/>anti-dsDNA antibodies decreased from 74.3 to 57.8 IU/mL; C3 increased from 0.739 to 0.520 g/L; C4 increased from 0.214 to 0.189 g/L after three courses of treatment.</p>                                                                                 | Injection site reactions                     |
| SLE-27 | 1 | Remission in rash                | 10-8=2  | <p>1. Rash disappeared after week 2.</p> <p>2. Renal variables: 24h-UPE changed from 1.79 to 1.66g/day after three courses of treatment.</p> <p>3. Immune variables:<br/>anti-dsDNA antibodies changed from 17 to 13.4 IU/mL; C3 changed from 1.470 to 1.620 g/L; C4 changed from 0.272 to 0.352 g/L after three courses of treatment.</p> | Injection site reactions;<br>Transient fever |
| SLE-28 | 2 | Withdrew at week 2               | —       |                                                                                                                                                                                                                                                                                                                                            |                                              |
| SLE-29 | 1 | Remission in proteinuria         | 20-4=16 | <p>1. Renal variables: 24h-UPE changed from 1.40 to 3.03g/day; WBC decreased from 119 to <math>9/\square\text{L}</math>; WBC changed from 34 to <math>10/\square\text{L}</math>; cylindruria 6 to 0 serum albumin increased from 34.9 to 46.9g/L after three courses of treatment.</p>                                                     | Injection site reactions                     |

|        |   |                                                         |         |                                                                                                                                                                                                                                                                                                                                                                   |                                                          |
|--------|---|---------------------------------------------------------|---------|-------------------------------------------------------------------------------------------------------------------------------------------------------------------------------------------------------------------------------------------------------------------------------------------------------------------------------------------------------------------|----------------------------------------------------------|
|        |   |                                                         |         | 2. Immune variables:<br>anti-dsDNA antibodies decreased from 436.82 to 36.4 IU/mL; C3 increased from 0.502 to 0.776 g/L; C4 increased from 0.094 to 0.180 g/L after three courses of treatment.                                                                                                                                                                   |                                                          |
| SLE-30 | 1 | Remission in proteinuria                                | 12-8=4  | 1. Renal variables: 24h-UPE changed from 1.44 to 0.84g/day after three courses of treatment.<br>2. Immune variables:<br>anti-dsDNA antibodies decreased from 42.4 to 7 IU/mL; anti-Rib-p antibodies decreased from 23.12 to 0.57 IU/ml; C3 changed from 1.22 to 1.530 g/L; C4 increased from 0.197 to 0.317 g/L after three courses of treatment.                 | None                                                     |
| SLE-31 | 2 | Remission in arthritis, thrombocytopenia and leukopenia | 18-2=16 | 1.Arthritis relieved after week 2.<br>2. Hematological variables: WBC increased from 2.0 to 4.08×10 <sup>9</sup> /ml after week 8; PLT increased from 83 to 231×10 <sup>9</sup> /ml after week 8.<br>2. Immune variables:<br>anti-dsDNA antibodies decreased from 189.46 to 23 IU/mL; C3 increased from 0.280 to 0.710 g/L; C4 increased from 0.038 to 0.126 g/L. | None                                                     |
| SLE-32 | 2 | Remission in rash and alopecia                          | 8-4=4   | 1. Rash and alopecia resolved after week 12.<br>2. Immune variables:<br>anti-dsDNA antibodies decreased from 436.34 to 146.5 IU/mL; C3 increased from 0.667 to 0.838 g/L; C4 increased from 0.062 to 0.107 g/L.                                                                                                                                                   | Injection site reactions;<br>Upper respiratory infection |
| SLE-33 | 1 | Remission in proteinuria                                | 10-4=6  | 1. Renal variables: 24h-UPE changed from 0.36 to 0.28g/day after week 24; RBC decreased from 147 to 12/□L.<br>2. Immune variables:<br>anti-dsDNA antibodies decreased from 342.68 to 149.7 IU/mL; C3                                                                                                                                                              | Fatigue                                                  |

|        |   |                                                                   |         |                                                                                                                                                                                                                                                                                                                                                                               |      |
|--------|---|-------------------------------------------------------------------|---------|-------------------------------------------------------------------------------------------------------------------------------------------------------------------------------------------------------------------------------------------------------------------------------------------------------------------------------------------------------------------------------|------|
|        |   |                                                                   |         | changed from 0.807 to 0.738 g/L; C4 changed from 0.191 to 0.197 g/L after three courses of treatment.                                                                                                                                                                                                                                                                         |      |
| SLE-34 | 2 | Remission in alopecia and fever                                   | 11-6=5  | 1. Fever reduced to normal and alopecia improved after week 2.<br>2. Immune variables:<br>anti-dsDNA antibodies decreased from 84.0 to 13.2 IU/mL; C3 changed from 0.627 to 0.836 g/L; C4 changed from 0.102 to 0.129 g/L.                                                                                                                                                    | None |
| SLE-35 | 2 | Remission in rash and thrombocytopenia                            | 9-4=5   | 1. Rash resolved after week 4.<br>2. PLT increased from 96 to 153×10 <sup>9</sup> /ml after week 8.<br>3. Immune variables:<br>anti-dsDNA antibodies changed from 1 to 1 IU/mL; C3 changed from 0.863 to 0.943 g/L; C4 changed from 0.176 to 0.185 g/L.                                                                                                                       | None |
| SLE-36 | 1 | Remission in leucocyturia                                         | 14-4=10 | 1. Renal variables: WBC decreased from 51 to 16/□L after three courses of treatment.<br>3. Immune variables:<br>anti-dsDNA antibodies changed from 37.7 to 33 IU/mL; C3 increased from 0.666 to 0.708 g/L; C4 increased from 0.103 to 0.145 g/L after three courses of treatment.                                                                                             | None |
| SLE-37 | 1 | Remission in alopecia, arthritis, vasculitis and thrombocytopenia | 21-8=13 | 1. Vasculitis improved after week 4; alopecia and arthritis resolved after three courses of treatment.<br>2. PLT increased from 84 to 207×10 <sup>9</sup> /ml after week 24;<br>3. Immune variables:<br>anti-dsDNA antibodies changed from 148.37 to 60.7 IU/mL; C3 increased from 0.375 to 0.855 g/L; C4 increased from 0.040 to 0.138 g/L after three courses of treatment. | None |

|        |   |                                                       |        |                                                                                                                                                                                                                                                                                                                             |                          |
|--------|---|-------------------------------------------------------|--------|-----------------------------------------------------------------------------------------------------------------------------------------------------------------------------------------------------------------------------------------------------------------------------------------------------------------------------|--------------------------|
| SLE-38 | 2 | Remission in alopecia, thrombocytopenia and hematuria | 11-4=7 | <p>1. Alopecia improved after week 6.</p> <p>2. Hematological variables: PLT increased from 4.0 to <math>79 \times 10^7/\text{ml}</math> after week 24.</p> <p>3. Immune variables: anti-dsDNA antibodies changed from 103.4 to 41.5 IU/mL; C3 increased from 0.284 to 0.761 g/L; C4 increased from 0.025 to 0.133 g/L.</p> | None                     |
| SLE-39 | 2 | Withdrew at week 4                                    | —      |                                                                                                                                                                                                                                                                                                                             |                          |
| SLE-40 | 1 | Remission in arthritis                                | 8-2=6  | <p>1. Arthritis relieved after week 2.</p> <p>2. Immune variables: anti-dsDNA antibodies changed from 43.9 to 66.2 IU/mL; C3 changed from 1.030 to 1.220 g/L; C4 changed from 0.211 to 0.231 g/L after three courses of treatment.</p>                                                                                      | Transient fever          |
| SLE-41 | 1 | Remission in vasculitis                               | 12-6=6 | <p>1. Lupus mesenteric vasculitis improved after week 2.</p> <p>2. Immune variables: anti-dsDNA antibodies changed from 465.78 to 51.8 IU/mL; C3 increased from 0.447 to 0.697 g/L; C4 increased from 0.127 to 0.152 g/L after three courses of treatment.</p>                                                              | None                     |
| SLE-42 | 1 | Remission in alopecia and rash                        | 8-0=8  | <p>1. Alopecia and rash resolved after week 4.</p> <p>2. Immune variables: anti-dsDNA antibodies changed from 1 to 1 IU/mL; C3 changed from 1.040 to 0.993 g/L; C4 changed from 0.200 to 0.197 g/L after three courses of treatment.</p>                                                                                    | Injection site reactions |
| SLE-43 | 2 | Remission in proteinuria                              | 12-8=4 | <p>1. Renal variables: 24h-UPE decreased from 1.47 to 0.81 g/day.</p> <p>2. Immune variables: anti-dsDNA antibodies changed from 25.8 to 39.8 IU/mL; C3 increased from 0.535 to 0.621 g/L; C4 changed from 0.193 to 0.252</p>                                                                                               | None                     |

|        |   |                                                     |         |                                                                                                                                                                                                                                                                              |                          |
|--------|---|-----------------------------------------------------|---------|------------------------------------------------------------------------------------------------------------------------------------------------------------------------------------------------------------------------------------------------------------------------------|--------------------------|
|        |   |                                                     |         | g/L.                                                                                                                                                                                                                                                                         |                          |
| SLE-44 | 2 | No remission in proteinuria                         | 12-8=4  | 1. Renal variables: 24h-UPE increased from 0.27 to 0.35 g/day after treatment.<br>2. Immune variables:<br>anti-dsDNA antibodies increased from 2525.53 to 3467.8 IU/mL; C3 increased from 0.563 to 0.594 g/L; C4 changed from 0.017 to 0.107 g/L.                            | None                     |
| SLE-45 | 2 | Remission in rash and arthritis                     | 10-4=6  | 1. Rash resolved after week 2; arthritis relieved after week 8.<br>2. Immune variables:<br>anti-dsDNA antibodies changed from 2460.8 to 173.6 IU/mL; C3 decreased from 0.586 to 0.541 g/L; C4 changed from 0.101 to 0.103 g/L.                                               | None                     |
| SLE-46 | 1 | Remission in proteinuria<br><br>Withdrew at week 12 | 12-10=2 | 1. Renal variables: 24h-UPE increased from 7.36 to 3.57 g/day after treatment.<br>2. Immune variables:<br>anti-dsDNA antibodies decreased from 32.8 to 17.4 IU/ml; C3 increased from 0.781 to 0.796 g/L; C4 changed from 0.225 to 0.24 g/L after three courses of treatment. | None                     |
| SLE-47 | 2 | Remission in rash and proteinuria                   | 8-6=2   | 1. Rash resolved after week 2.<br>2. Renal variables: 24h-UPE decreased from 2.54 to 1.18 g/day.<br>3. Immune variables:<br>anti-dsDNA antibodies changed from 19.8 to 17.8 IU/mL; C3 decreased from 0.640 to 0.593 g/L; C4 increased from 0.158 to 0.188 g/L.               | None                     |
| SLE-48 | 1 | Remission in arthritis and alopecia                 | 12-2=10 | 1. Arthritis and alopecia improved after week 6.<br>2. Immune variables:<br>anti-dsDNA antibodies changed from 23.5 to 11 IU/mL; C3 increased                                                                                                                                | Injection site reactions |

|        |   |                                           |        |                                                                                                                                                                                                                                                                                                                                                                                   |                                           |
|--------|---|-------------------------------------------|--------|-----------------------------------------------------------------------------------------------------------------------------------------------------------------------------------------------------------------------------------------------------------------------------------------------------------------------------------------------------------------------------------|-------------------------------------------|
|        |   |                                           |        | from 0.704 to 0.770 g/L; C4 increased from 0.142 to 0.176 g/L after three courses of treatment.                                                                                                                                                                                                                                                                                   |                                           |
| SLE-49 | 2 | Remission in alopecia and vasculitis      | 12-6=6 | 1. Vasculitis and alopecia improved after week 6.<br>2. Immune variables:<br>anti-dsDNA antibodies decreased from 394.98 to 54.5 IU/mL; C3 decreased from 0.829 to 0.761 g/L; C4 changed from 0.179 to 0.216 g/L.                                                                                                                                                                 | Upper respiratory infection (Pharyngitis) |
| SLE-50 | 2 | Remission in myositis                     | 12-4=8 | 1. Myositis improved after week 4; arthritis relieved after week 24.<br>2. Immune variables:<br>anti-dsDNA antibodies increased from 73.3 to 117.8 IU/mL; C3 decreased from 0.767 to 0.551 g/L; C4 decreased from 0.103 to 0.078 g/L.                                                                                                                                             | None                                      |
| SLE-51 | 1 | Remission in hematuria                    | 10-8=2 | 1. Renal variables: RBC decreased from 250 to 4/□L; WBC decreased from 24 to 6/□L after three courses of treatment.<br>2. Immune variables:<br>anti-dsDNA antibodies changed from 29.6 to 31.9 IU/mL; C3 decreased from 0.72 to 0.633 g/L; C4 increased from 0.104 to 0.117 g/L after three courses of treatment.                                                                 | Flu-like symptoms                         |
| SLE-52 | 1 | Remission in arthritis and oral ulcers    | 9-5=4  | 1. Oral ulcers improved after week 4; arthritis relieved after week 6.<br>2. Hematological variables: PLT increased from 62 to $83 \times 10^9$ /ml after three courses of treatment.<br>3. Immune variables:<br>anti-dsDNA antibodies changed from 6.2 to 11.1 IU/mL; C3 changed from 0.989 to 0.870 g/L; C4 increased from 0.147 to 0.166 g/L after three courses of treatment. | Injection site reactions                  |
| SLE-53 | 1 | Remission in rash, alopecia and arthritis | 13-7=6 | 1. Alopecia and rash improved after week 2; arthritis relieved after week 4.                                                                                                                                                                                                                                                                                                      | None                                      |

|        |   |                                     |         |                                                                                                                                                                                                                                                                                                                                                                                                                                                                                                                                                                       |                         |
|--------|---|-------------------------------------|---------|-----------------------------------------------------------------------------------------------------------------------------------------------------------------------------------------------------------------------------------------------------------------------------------------------------------------------------------------------------------------------------------------------------------------------------------------------------------------------------------------------------------------------------------------------------------------------|-------------------------|
|        |   |                                     |         | <p>2. Hematological variables: PLT increased from 70 to <math>102 \times 10^9/\text{ml}</math> after three course of treatment.</p> <p>3. Immune variables:<br/>anti-dsDNA antibodies changed from 34.8 to 26.6 IU/mL; C3 increased from 0.616 to 0.668 g/L; C4 increased from 0.123 to 0.187 g/L after three courses of treatment.</p>                                                                                                                                                                                                                               |                         |
| SLE-54 | 1 | Remission in rash and proteinuria   | 11-9=2  | <p>1. Rash improved after week 2.</p> <p>2. Renal variables: 24h-UPE decreased from 0.39 to 0.28 g/day after two courses of treatment.</p> <p>3. Hematological variables: PLT increased from 68 to <math>100 \times 10^9/\text{ml}</math> after two courses of treatment, but decreased to <math>60 \times 10^9/\text{ml}</math> after three courses of treatment.</p> <p>4. Immune variables:<br/>anti-dsDNA antibodies changed from 6.4 to 10.8 IU/mL; C3 changed from 1.090 to 1.520 g/L; C4 changed from 0.343 to 0.417 g/L after three courses of treatment.</p> | Transient fever         |
| SLE-55 | 2 | Remission in vasculitis             | 18-12=6 | <p>1. Vasculitis improved after week 10.</p> <p>2. Renal variables: 24h-UPE increased from 4.48 to 5.48 g/day; serum albumin decreased from 35.3 to 33.8 g/day.</p> <p>4. Immune variables:<br/>anti-dsDNA antibodies increased from 10.5 to 34.6 IU/mL; C3 changed from 0.536 to 0.576 g/L; C4 changed from 0.101 to 0.101 g/L.</p>                                                                                                                                                                                                                                  | None                    |
| SLE-56 | 2 | Remission in arthritis and myositis | 12-6=6  | <p>1. Arthritis and myositis improved after week 20.</p> <p>2. Immune variables:<br/>anti-dsDNA antibodies decreased from 44.3 to 37 IU/mL; C3 decreased from 1.140 to 0.946 g/L; C4 changed from 0.225 to 0.200</p>                                                                                                                                                                                                                                                                                                                                                  | Urinary tract infection |

|        |   |                                        |         |                                                                                                                                                                                                                                                                    |                 |
|--------|---|----------------------------------------|---------|--------------------------------------------------------------------------------------------------------------------------------------------------------------------------------------------------------------------------------------------------------------------|-----------------|
|        |   |                                        |         | g/L.                                                                                                                                                                                                                                                               |                 |
| SLE-57 | 2 | Remission in rash and proteinuria      | 10-3=7  | 1. Rash improved after week 2.<br>2. Renal variables: 24h-UPE decreased from 0.64 to 0.38 g/day.<br>3. Immune variables:<br>anti-dsDNA antibodies increased from 119.8 to 173.2 IU/mL; C3 changed from 0.922 to 0.808 g/L; C4 changed from 0.268 to 0.300 g/L.     | None            |
| SLE-58 | 1 | Remission in vasculitis and alopecia   | 14-6=8  | 1. Alopecia improved after week 4; vasculitis improved after week 10.<br>2. Immune variables:<br>anti-dsDNA antibodies increased from 25.4 to 43.5 IU/mL; C3 changed from 1.250 to 0.909 g/L; C4 changed from 0.158 to 0.151 g/L after three courses of treatment. | None            |
| SLE-59 | 2 | Remission in rash                      | 12-2=10 | 1. Rash improved after week 2.<br>2. Immune variables:<br>anti-dsDNA antibodies increased from 1 to 7.2 IU/mL; C3 increased from 0.564 to 0.912 g/L; C4 increased from 0.056 to 0.222 g/L.                                                                         | None            |
| SLE-60 | 1 | No remission in alopecia and arthritis | 8-10=-2 | 1. Immune variables:<br>anti-dsDNA antibodies increased from 15.5 to 28.8 IU/mL; C3 changed from 0.789 to 0.764 g/L; C4 changed from 0.129 to 0.143 g/L after three courses of treatment.                                                                          | Transient fever |



**Table S4. Responses of SLE patients to low-dose IL-2 treatment**

| Characteristics                         | Baseline        | Week 12                 | Week 24                  | week 0 vs 12<br>vs 24         | IL-2 vs<br>placebo |
|-----------------------------------------|-----------------|-------------------------|--------------------------|-------------------------------|--------------------|
| SLEDAI, median (range)                  |                 |                         |                          |                               |                    |
| IL-2                                    | 12 (8-27)       | 6 (0-16) <sup>aa</sup>  | 4 (0-18) <sup>aa</sup>   | <i>F</i> =18.561,             | <i>F</i> =0.251,   |
| Placebo                                 | 11 (8-22)       | 6 (0-25) <sup>aa</sup>  | 8 (0-25) <sup>a</sup>    | <i>P</i> <0.001               | <i>P</i> =0.628    |
| ≥1 BLIAG A or 2B score,% (%)            |                 |                         |                          |                               |                    |
| IL-2                                    | 21 (72.41 )     | 2 (6.9)                 | 1 (3.45)                 | <i>X</i> <sup>2</sup> =0.843, |                    |
| Placebo                                 | 21 (70)         | 4 (13.33)               | 2 (6.67)                 | <i>P</i> =0.656               |                    |
| PGA, median (range)                     |                 |                         |                          |                               |                    |
| IL-2                                    | 2.3 (1.55-2.75) | 0 (0-2) <sup>aaa</sup>  | 0 (0-1) <sup>aaab</sup>  | <i>F</i> =54.898,             | <i>F</i> =2.705,   |
| Placebo                                 | 2.2 (1-2.3)     | 1 (0-2) <sup>aaa</sup>  | 1 (0-1) <sup>aa</sup>    | <i>P</i> <0.001               | <i>P</i> =0.112    |
| Rash, n (%)                             |                 |                         |                          |                               |                    |
| IL-2                                    | 13 (44.83)      | 2 (6.90)                | 2 (6.90)                 | <i>X</i> <sup>2</sup> =1.781, |                    |
| Placebo                                 | 16 (53.33)      | 6 (20.0)                | 6 (20.0)                 | <i>P</i> =0.411               |                    |
| Oral ulceration, n (%)                  |                 |                         |                          |                               |                    |
| IL-2                                    | 4 (13.79)       | 0 (0)                   | 0 (0)                    | -                             |                    |
| Placebo                                 | 1 (3.33)        | 0 (0)                   | 0 (0)                    |                               |                    |
| Arthritis, n (%)                        |                 |                         |                          |                               |                    |
| IL-2                                    | 14 (48.28)      | 4 (13.79)               | 3 (10.34)                | <i>X</i> <sup>2</sup> =2.067, |                    |
| Placebo                                 | 15 (50.0)       | 9 (30.00)               | 8 (26.67)                | <i>P</i> =0.356               |                    |
| Vasculitis, n (%)                       |                 |                         |                          |                               |                    |
| IL-2                                    | 4 (13.79)       | 0 (0)                   | 0 (0)                    | -                             |                    |
| Placebo                                 | 2 (6.67)        | 0 (0)                   | 0 (0)                    |                               |                    |
| Alopecia, n (%)                         |                 |                         |                          |                               |                    |
| IL-2                                    | 12 (41.38)      | 6 (20.69)               | 5 (17.24)                | <i>X</i> <sup>2</sup> =0.425, |                    |
| Placebo                                 | 7 (23.33)       | 2 (6.67)                | 2 (6.67)                 | <i>P</i> =0.809               |                    |
| Fever, n (%)                            |                 |                         |                          |                               |                    |
| IL-2                                    | 3 (10.34)       | 0 (0)                   | 0 (0)                    | <i>X</i> <sup>2</sup> =0.024, |                    |
| Placebo                                 | 4 (13.33)       | 1 (3.33)                | 0 (0)                    | <i>P</i> =0.312               |                    |
| Myositis, n (%)                         |                 |                         |                          |                               |                    |
| IL-2                                    | 1 (3.45)        | 0 (0)                   | 0 (0)                    | -                             |                    |
| Placebo                                 | 2 (6.67)        | 0 (0)                   | 0 (0)                    |                               |                    |
| Prednisone dose, mg/day, median (range) |                 |                         |                          |                               |                    |
| IL-2                                    | 15 (0-50)       | 10 (0-25) <sup>aa</sup> | 10 (0-20) <sup>aa</sup>  | <i>F</i> =13.872,             | <i>F</i> =0.232,   |
| Placebo                                 | 15 (7.5-60)     | 15 (5-40)               | 10 (2.5-35) <sup>a</sup> | <i>P</i> <0.001               | <i>P</i> =0.634    |
| ANA decreased, n (%)                    |                 |                         |                          |                               |                    |
| IL-2, n=29                              | 0 (0)           | 7 (24.14)               | 8 (27.59)                | <i>X</i> <sup>2</sup> =0.005, |                    |

|                                    |                        |                         |                        |              |            |
|------------------------------------|------------------------|-------------------------|------------------------|--------------|------------|
| Placebo, n=30                      | 0 (0)                  | 11 (36.67)              | 12(40.0)               | $P=0.944$    |            |
| Anti-ds-DNA, IU/ml, median (range) |                        |                         |                        |              |            |
| IL-2, n=29                         | 34.80<br>(1.0-1783.15) | 33.0<br>(7.0-876.21)    | 29.0<br>(1.0-348.50)   | $F=8.955,$   | $F=0.067,$ |
| Placebo, n=30                      | 73.30<br>(1.0-2525.53) | 37.60<br>(1.40-3467.80) | 36.3<br>(1.0-3467.80)  | $P=0.005$    | $P=0.807$  |
| AnuA, IU/ml, median (range)        |                        |                         |                        |              |            |
| IL-2, n=29                         | 14.45<br>(0.87-449.06) | 20.84<br>(1.28-287.07)  | 16.72<br>(1.17-287.07) | $F=1.358,$   | $F=1.323,$ |
| Placebo, n=30                      | 41.725<br>(0.0-315.80) | 16.03<br>(0.0-296.32)   | 12.08<br>(0.0-266.740) | $P=0.451$    | $P=0.456$  |
| Albumin, g/L, median (range)       |                        |                         |                        |              |            |
| IL-2, n=29                         | 39.25<br>(27.60,44.70) | 43.90<br>(37.70,46.90)  | 43.50<br>(39.80,47.20) | $F=1.282,$   | $F=0.141,$ |
| Placebo, n=30                      | 39.80<br>(25.10,44.40) | 38.65<br>(31.90,43.60)  | 40.40<br>(32.80,47.50) | $P=0.276$    | $P=0.302$  |
| LN Complete remission, n (%)       |                        |                         |                        |              |            |
| IL-2, n=13                         | 0 (0)                  | 7 (53.85)               | 7 (53.85)              | $X^2=0.281,$ |            |
| Placebo, n=12                      | 0 (0)                  | 1 (8.33)                | 2 (16.67)              | $P=0.596$    |            |
| LN Partial remission, n (%)        |                        |                         |                        |              |            |
| IL-2, n=13                         | 0 (0)                  | 10 (76.92)              | 10 (76.92)             | $X^2=0.708,$ |            |
| Placebo, n=12                      | 0 (0)                  | 3 (25.0)                | 6 (50.0)               | $P=0.400$    |            |

<sup>a</sup> means  $\alpha < 0.05$ , <sup>aa</sup> means  $\alpha < 0.01$ , compared to Baseline

<sup>b</sup> means  $\alpha < 0.05$ , compared to week 12

**Table S5 Laboratory Improvement in LN patients**

| Variable           | 12 Weeks of Treatment |                      | 24 Weeks of Treatment |                     |
|--------------------|-----------------------|----------------------|-----------------------|---------------------|
|                    | IL-2 (n=13)           | Placebo (n=12)       | IL-2 (n=13)           | Placebo (n=12)      |
| PRO, g/24hr        | 0.78 (0.06,2.39)      | 1.765 (0.17,5.48)*   | 0.48 (0.06,1.42)      | 1.08 (0.26,7.75) *  |
| Alb, g/L           | 43.90 (37.70,46.90)   | 38.65 (31.90,43.60)* | 43.50 (39.80,47.20)   | 40.40 (32.80,47.50) |
| Cr, $\mu$ mol/L    | 53.5 (43,298)         | 64.5 (40,138)        | 57 (45,129)           | 65 (40,109)         |
| Routine urianlysis |                       |                      |                       |                     |
| WBC, / $\mu$ l     | 2 (2,357)             | 11 (4,89)            | 11 (2,57)             | 10 (3,195)          |
| RBC, / $\mu$ l,    | 11 (3,241)            | 18 (2,104)           | 20.5 (2,317)          | 27.5 (9,166)        |
| casts,n(%)         | 2 (15.38)             | 3 (25)               | 0 (0)                 | 0 (0)               |
| C3, mg/L           | 0.855 (0.70, 1.62)    | 0.623 (0.54, 1.02)   | 0.737 (0.64, 1.83)    | 0.769 (0.47, 1.20)  |
| C4, mg/L           | 0.1800 (0.14, 0.42)   | 0.1745 (0.06, 0.30)  | 0.2270 (0.10,0.42)    | 0.1955 (0.09, 0.30) |
| Anti-dsDNA,IU/ml   | 22.25 (1.00,53.20)    | 59.85 (1.00,200.91)  | 27.35 (9.00,62.80)    | 35.70 (8.70,398.25) |

(\*:P&lt;0.05)

**Table S6. Viral load in SLE with IL-2 treatment**

|          | Week 0         | Week 2         | Week10          |
|----------|----------------|----------------|-----------------|
| BK virus | $10^8$ copy/ml | $10^3$ copy/ml | $<10^3$ copy/ml |
| BK virus | $10^7$ copy/ml | $10^5$ copy/ml | $<10^3$ copy/ml |
| HPV      | ++             | N/A            | —               |

**Table S7. Virus examined in sera of SLE patients by real-time PCR**

| No. | Virus                       | Normal values                                                                                                 |
|-----|-----------------------------|---------------------------------------------------------------------------------------------------------------|
| 1   | Influenza A virus – H1N1    | $<1.0 \times 10^3$ PFU/ml                                                                                     |
| 2   | Influenza B virus           | $<1.5 \times 10^2$ PFU/ml                                                                                     |
| 3   | Influenza A virus           | $<1.6 \times 10^2$ PFU/ml                                                                                     |
| 4   | Parainfluenza virus         | $<1.0 \times 10^3$ copies/ml                                                                                  |
| 5   | Coxsackie virus             | <CCID standard: $1.0 \times 10^{-2}$ CCID <sub>50</sub> /0.1ml;<br>plaque calculate: $1.0 \times 10^3$ PFU/ml |
| 6   | Mycoplasma pneumoniae       | $<1.0 \times 10^4$ copies/ml                                                                                  |
| 7   | Legionella pneumophila      | $<1.0 \times 10^3$ copies/ml                                                                                  |
| 8   | Respiratory syncytial virus | $<1.0 \times 10^3$ copies/ml                                                                                  |
| 9   | Human bocavirus             | $<1.0 \times 10^3$ copies/ml                                                                                  |
| 10  | Human metapneumovirus       | $<1.0 \times 10^3$ copies/ml                                                                                  |
| 11  | Human coronavirus - 229E    | $<1.0 \times 10^3$ copies/ml                                                                                  |
| 12  | Human coronavirus - HKU1    | $<1.0 \times 10^3$ copies/ml                                                                                  |
| 13  | Human coronavirus - NL63    | $<1.0 \times 10^3$ copies/ml                                                                                  |
| 14  | Human coronavirus - 229E    | $<1.0 \times 10^3$ copies/ml                                                                                  |
| 15  | Herpes simplex virus        | $<5.0 \times 10^3$ copies/ml                                                                                  |
| 16  | Human herpes virus-6        | $<4.0 \times 10^2$ copies/ml                                                                                  |
| 17  | Human herpes virus-8        | $<5.0 \times 10^3$ copies/ml                                                                                  |
| 18  | Enterovirus                 | <CCID standard: $5.0 \times 10^2$ CCID <sub>50</sub> /0.1ml;<br>Plaque calculate: $2.0 \times 10^3$ PFU/ml    |
| 19  | Norwalk virus               | $<1.0 \times 10^3$ copies/ml                                                                                  |
| 20  | Enterovirus-71              | $<1.0 \times 10^3$ copies/ml                                                                                  |
| 21  | Rotavirus                   | $<1.0 \times 10^3$ copies/ml                                                                                  |
| 22  | BKV                         | $<5.0 \times 10^3$ copies/ml                                                                                  |
| 23  | JC virus                    | $<1.0 \times 10^3$ copies/ml                                                                                  |
| 24  | Adenoviridae                | $<1.0 \times 10^4$ copies/ml                                                                                  |
| 25  | Cytomegalovirus             | $<1.0 \times 10^3$ copies/ml                                                                                  |
| 26  | Varicella Zoster Virus      | $<1.0 \times 10^3$ copies/ml                                                                                  |
| 27  | Mycobacterium               | $<10^2$ Bacteria / PCR reaction                                                                               |
| 28  | Human coronavirus -OC43     | $<1.0 \times 10^4$ copies/ml                                                                                  |
| 29  | Epstein-Barr Virus          | $<5.0 \times 10^3$ copies/ml                                                                                  |
| 30  | Human Parovirus B19         | $<1.0 \times 10^3$ copies/ml                                                                                  |

**Table S8. Antibodies used in flow cytometric analysis in this study**

| Target antigen | Clone    | Fluorochrome         | Vendor    |
|----------------|----------|----------------------|-----------|
| CD3            | OKT3     | Alexa Fluor 700      | Biolegend |
| CD4            | SK3      | FITC                 | Biolegend |
| CD8            | SK1      | PerCP                | Biolegend |
| CD25           | BC96     | PE                   | Biolegend |
| CD127          | A019D5   | Brilliant Violet 605 | Biolegend |
| CD45RA         | HI100    | Brilliant Violet 510 | Biolegend |
| CXCR3          | G025H7   | PECF 594             | BD        |
| CXCR5          | J252D4   | Alexa Fluor 647      | BD        |
| CCR6           | G034E3   | Brilliant Violet 650 | Biolegend |
| CCR7           | G043H7   | Brilliant Violet 421 | Biolegend |
| PD-1           | EH12_2H7 | PE-Cy7               | Biolegend |
| CD56           | HCD56    | APC                  | eBiosense |
| CD16           | 3G8      | Brilliant Violet 421 | Biolegend |

**Table S9. Immune cell changes in SLE patients with low-dose IL-2 treatment**

| Variables                      | Baseline    | Week 10     | Week 12     | Week 24     | P value<br>(Week 0<br>vs 10) | P value<br>(Week 0<br>vs 12) |
|--------------------------------|-------------|-------------|-------------|-------------|------------------------------|------------------------------|
| <b>CD4+ T cells (%)</b>        |             |             |             |             |                              |                              |
| IL-2, mean□SD                  | 43.37±11.19 | 41.27±11.56 | 43.82±14.70 | 42.70±12.93 | 0.220                        | 0.387                        |
| Placebo, mean□SD               | 41.61±11.24 | 40.68±11.61 | 45.02±10.35 | 39.97±14.76 | 0.403                        | 0.085                        |
| <b>Treg cells (%)</b>          |             |             |             |             |                              |                              |
| IL-2, mean□SD                  | 12.77±10.25 | 16.79±8.60  | 14.19±6.07  | 12.11±6.27  | 0.007                        | 0.020                        |
| Placebo, mean□SD               | 11.02±3.51  | 10.51±3.79  | 10.97±4.59  | 11.16±4.69  | 0.534                        | 0.814                        |
| <b>CD8+ T cells (%)</b>        |             |             |             |             |                              |                              |
| IL-2, mean□SD                  | 46.17±12.37 | 47.54±13.06 | 46.42±13.68 | 46.19±12.06 | 0.580                        | 0.677                        |
| Placebo, mean□SD               | 45.78±13.83 | 46.07±14.85 | 45.16±13.20 | 49.62±14.18 | 0.931                        | 0.905                        |
| <b>NK cells (%)</b>            |             |             |             |             |                              |                              |
| IL-2, mean□SD                  | 6.48±4.85   | 12.07±8.01  | 10.2±8.05   | 7.28±4.15   | 0.003                        | 0.012                        |
| Placebo, mean□SD               | 6.49±6.02   | 6.80±6.42   | 5.44±4.47   | 6.30±5.31   | 0.967                        | 0.516                        |
| <b>CD56bri in NK cells (%)</b> |             |             |             |             |                              |                              |
| IL-2, mean□SD                  | 6.68±4.45   | 10.40±6.49  | 6.54±4.07   | 6.70±5.46   | 0.011                        | 0.938                        |
| Placebo, mean□SD               | 8.10±6.99   | 6.56±4.65   | 7.43±5.67   | 9.41±7.53   | 0.476                        | 0.737                        |
| <b>CD56dim in NK cells (%)</b> |             |             |             |             |                              |                              |
| IL-2, mean□SD                  | 76.20±9.47  | 68.27±17.5  | 78.77±9.48  | 78.22±9.21  | 0.059                        | 0.423                        |
| Placebo, mean□SD               | 66.41±21.7  | 71.1±17.96  | 69.87±19.78 | 66.78±21.25 | 0.421                        | 0.627                        |

**Table S10. Baseline characteristics of SLE patients in trial NCT02932137 (n=20)**

| Characteristics                         | IL-2<br>(n=10)    | Placebo<br>(n=10) | P value |
|-----------------------------------------|-------------------|-------------------|---------|
| Age, year, mean $\pm$ SD                | 35.2 $\pm$ 11.76  | 32.9 $\pm$ 11.96  | 0.670   |
| Female/Male                             | 9/1               | 10/0              | 1.000   |
| Duration, year, mean $\pm$ SD           | 74.8 $\pm$ 45.2   | 66.0 $\pm$ 49.4   | 0.683   |
| SLEDAI, median (range)                  | 8.6 $\pm$ 4.6     | 9.4 $\pm$ 8.0     | 0.787   |
| Medications                             |                   |                   |         |
| Prednisone dose, mg/day, median (range) | 15.13 $\pm$ 10.35 | 17.75 $\pm$ 20.19 | 0.719   |
| Hydroxychloroquine                      | 9 (90.0)          | 8 (80.0)          | 1.000   |
| Cyclophosphamide                        | 1 (10.0)          | 2 (20.0)          | 1.000   |
| Cyclosporine                            | 3 (30.0)          | 2 (20.0)          | 1.000   |
| Mycophenolate Mofetil                   | 4 (40.0)          | 2 (20.0)          | 0.626   |

**Table S11. Phenotypic change of NK cells in SLE patients**

| Variables                                               | Baseline          | Post Treatment    | P value |
|---------------------------------------------------------|-------------------|-------------------|---------|
| <b>IFN-<math>\gamma</math><sup>+</sup> NK cells (%)</b> |                   |                   |         |
| IL-2, mean $\pm$ SD                                     | 68.92 $\pm$ 16.92 | 82.81 $\pm$ 12.22 | 0.024   |
| Standard treatment, mean $\pm$ SD                       | 65.76 $\pm$ 14.46 | 73.51 $\pm$ 17.26 | 0.254   |
| <b>NKp46<sup>+</sup> NK cells (%)</b>                   |                   |                   |         |
| IL-2, mean $\pm$ SD                                     | 92.68 $\pm$ 4.40  | 96.87 $\pm$ 2.71  | 0.025   |
| Standard treatment, mean $\pm$ SD                       | 92.11 $\pm$ 6.56  | 94.07 $\pm$ 6.85  | 0.562   |
| <b>NKG2D<sup>+</sup> NK cells (%)</b>                   |                   |                   |         |
| IL-2, mean $\pm$ SD                                     | 83.84 $\pm$ 4.47  | 91.11 $\pm$ 6.14  | 0.003   |
| Standard treatment, mean $\pm$ SD                       | 88.46 $\pm$ 6.18  | 88.02 $\pm$ 6.92  | 0.748   |

\* IL-2 group (n=10); standard treatment group (n=10).



**Table S12. Phenotype changes of CD8+ T cells in SLE patients**

| Variables                                        | Baseline          | Post Treatment    | P value |
|--------------------------------------------------|-------------------|-------------------|---------|
| <b>IFN-<math>\gamma</math>+ CD8+ T cells (%)</b> |                   |                   |         |
| IL-2, mean $\pm$ SD                              | 82.30 $\pm$ 8.48  | 85.42 $\pm$ 15.57 | 0.540   |
| Standard treatment, mean $\pm$ SD                | 74.29 $\pm$ 12.89 | 77.87 $\pm$ 15.06 | 0.553   |
| <b>TNF-<math>\alpha</math>+ CD8+ T cells (%)</b> |                   |                   |         |
| IL-2, mean $\pm$ SD                              | 1.43 $\pm$ 1.85   | 1.53 $\pm$ 1.73   | 0.464   |
| Standard treatment, mean $\pm$ SD                | 2.03 $\pm$ 3.05   | 2.35 $\pm$ 3.21   | 0.493   |
| <b>Perforin+ CD8+ T cells (%)</b>                |                   |                   |         |
| IL-2, mean $\pm$ SD                              | 10.07 $\pm$ 6.27  | 8.46 $\pm$ 5.57   | 0.248   |
| Standard treatment, mean $\pm$ SD                | 12.54 $\pm$ 18.56 | 17.14 $\pm$ 17.74 | 0.242   |

\*IL-2 group (n=10); standard treatment group (n=10).

**Table S13. SRI-4 changes in SLE patients**

| SRI-4 (%) | Week0 | Week2 | Week4 | Week6 | Week8 | Week10 | Week12 | Week16 | Week20 | Week24 |
|-----------|-------|-------|-------|-------|-------|--------|--------|--------|--------|--------|
| IL-2      | 0     | 10.34 | 17.24 | 34.48 | 37.93 | 48.28  | 55.17  | 58.62  | 65.52  | 65.52  |
| Placebo   | 0     | 6.67  | 6.67  | 10.0  | 13.33 | 23.33  | 30.0   | 30.0   | 30.0   | 36.67  |
| P value   | -     | 0.968 | 0.394 | 0.023 | 0.030 | 0.045  | 0.052  | 0.027  | 0.06   | 0.027  |

**Table S14. SLEDAI score changes in SLE patients**

| <b>SLEDAI, median (range)</b> | <b>Week0</b> | <b>Week2</b> | <b>Week4</b> | <b>Week6</b> | <b>Week8</b> | <b>Week10</b> | <b>Week12</b> | <b>Week16</b> | <b>Week20</b> | <b>Week24</b> |
|-------------------------------|--------------|--------------|--------------|--------------|--------------|---------------|---------------|---------------|---------------|---------------|
| IL-2                          | 12 (8-27)    | 8 (2-20)     | 7 (1-18)     | 6 (0-16)     | 6 (0-16)     | 4 (0-12)      | 6 (0-16)      | 4 (0-12)      | 4 (0-18)      | 4 (0-18)      |
| Placebo                       | 11 (8-22)    | 8 (0-20)     | 8 (0-20)     | 8 (0-16)     | 6 (0-25)     | 6 (2-25)      | 6 (0-25)      | 6 (0-25)      | 7 (0-25)      | 8 (0-25)      |
| P value                       | 0.378        | 0.921        | 0.192        | 0.290        | 0.198        | 0.052         | 0.618         | 0.177         | 0.013         | 0.027         |

**Table S15. LN complete remission rates in SLE patients**

| <b>LN Complete remission, n (%)</b> | <b>Week 0</b> | <b>Week 12</b> | <b>Week 24</b> |
|-------------------------------------|---------------|----------------|----------------|
| IL-2, n=13                          | 0 (0)         | 7 (53.85)      | 7 (53.85)      |
| Placebo, n=12                       | 0 (0)         | 1 (8.33)       | 2 (16.67)      |
| P value                             | 1.000         | 0.013          | 0.036          |

**Table S16. Proportions of patients achieving corticosteroid reduction by  $\geq 50\%$  from baseline to 24 weeks**

| <b>(%)</b> | <b>Week0</b> | <b>Week2</b> | <b>Week4</b> | <b>Week6</b> | <b>Week8</b> | <b>Week10</b> | <b>Week12</b> | <b>Week16</b> | <b>Week20</b> | <b>Week24</b> |
|------------|--------------|--------------|--------------|--------------|--------------|---------------|---------------|---------------|---------------|---------------|
| IL-2       | 0            | 0            | 0            | 3.45         | 6.90         | 24.14         | 37.93         | 41.38         | 44.83         | 44.83         |
| Placebo    | 0            | 0            | 0            | 0            | 3.33         | 13.33         | 20.0          | 30.0          | 30.0          | 33.33         |
| P value    | -            | -            | -            | 0.492        | 0.487        | 0.233         | 0.109         | 0.261         | 0.182         | 0.262         |

**Table S17. Changes of Albumin in SLE patients**

| Albumin, g/L, median<br>(range) | Week 0                 | Week 12                | Week 24                | P value<br>(Week 0 vs 12) | P value<br>(Week 0 vs 24) |
|---------------------------------|------------------------|------------------------|------------------------|---------------------------|---------------------------|
| IL-2, n=13                      | 40.50<br>(25.10,44.40) | 38.30<br>(31.90,43.60) | 40.40<br>(32.80,47.50) | 0.386                     | 0.293                     |
| Placebo, n=12                   | 39.25<br>(27.60,44.70) | 43.90<br>(37.70,46.90) | 43.50<br>(39.80,47.20) | 0.013                     | 0.006                     |
| P value                         | 0.712                  | 0.002                  | 0.186                  | --                        | --                        |

**Table S18. Changes of proteinuria per 24 hours in SLE patients**

| PRO, g/24hr   | Week 0    | Week 12   | Week 24   | P value<br>(Week 0 vs 12) | P value<br>(Week 0 vs 24) |
|---------------|-----------|-----------|-----------|---------------------------|---------------------------|
| IL-2, n=13    | 1.55±1.87 | 0.79±0.75 | 0.48±0.47 | 0.058                     | 0.002                     |
| Placebo, n=12 | 2.42±2.09 | 2.21±1.83 | 3.44±2.68 | 0.466                     | 0.372                     |
| P value       | 0.283     | 0.023     | 0.002     | --                        | --                        |

**Table S19. Proportions of patients with recovered C3 levels from baseline to 24 weeks**

| (%)     | Week0 | Week2 | Week4 | Week6 | Week8 | Week10 | Week12 | Week16 | Week20 | Week24 |
|---------|-------|-------|-------|-------|-------|--------|--------|--------|--------|--------|
| IL-2    | 0     | 31.25 | 43.75 | 50    | 31.25 | 56.25  | 25     | 25     | 31.25  | 31.25  |
| Placebo | 0     | 15    | 28.57 | 38.10 | 38.10 | 42.86  | 33.33  | 28.57  | 23.81  | 23.81  |
| P value | -     | 0.223 | 0.270 | 0.348 | 0.468 | 0.317  | 0.429  | 0.550  | 0.445  | 0.445  |

**Table S20. Proportions of patients with recovered C4 levels from baseline to 24 weeks**

| (%)     | Week 0 | Week2 | Week4 | Week6 | Week8 | Week10 | Week12 | Week16 | Week20 | Week24 |
|---------|--------|-------|-------|-------|-------|--------|--------|--------|--------|--------|
| IL-2    | 0      | 11.76 | 5.885 | 35.29 | 17.65 | 47.06  | 29.41  | 41.18  | 41.18  | 35.29  |
| Placebo | 0      | 15    | 10    | 15    | 20    | 15     | 20     | 20     | 201    | 20     |
| P value | -      | 0.580 | 0.562 | 0.147 | 0.420 | 0.038  | 0.140  | 0.034  | 0.034  | 0.072  |

Table S21. Changes of immune cell subsets

| Variables                      | Baseline    | Week 2      | Week 4      | Week 6      | Week 8      | Week 10     | Week 12     | Week 16     | Week 20     | Week 24     |
|--------------------------------|-------------|-------------|-------------|-------------|-------------|-------------|-------------|-------------|-------------|-------------|
| <b>CD4+ T cells (%)</b>        |             |             |             |             |             |             |             |             |             |             |
| IL-2, mean□SD                  | 43.37±11.19 | 46.15±11.13 | 40.19±12.35 | 41.86±10.75 | 39.38±11.56 | 41.27±11.56 | 43.82±14.70 | 46.19±13.42 | 41.97±14.59 | 42.70±12.93 |
| Placebo, mean□SD               | 41.61±11.24 | 40.70±13.64 | 41.20±12.43 | 39.11±13.68 | 40.16±12.25 | 40.68±11.61 | 45.02±10.35 | 44.72±9.14  | 43.06±10.40 | 39.97±14.76 |
| P value                        | 0.689       | 0.138       | 0.742       | 0.410       | 0.775       | 0.942       | 0.461       | 0.848       | 0.800       | 0.661       |
| <b>Treg cells (%)</b>          |             |             |             |             |             |             |             |             |             |             |
| IL-2, mean□SD                  | 12.77±10.25 | 17.62±8.37  | 13.29±7.40  | 17.90±7.09  | 13.14±7.02  | 16.79±8.60  | 14.19±6.07  | 13.47±6.87  | 11.28±4.64  | 12.11±6.27  |
| Placebo, mean□SD               | 11.02±3.51  | 10.95±4.10  | 10.47±4.36  | 11.14±5.15  | 10.64±4.16  | 10.51±3.79  | 10.97±4.59  | 12.22±5.68  | 11.10±4.69  | 11.16±4.69  |
| P value                        | 0.516       | <0.001      | 0.300       | <0.001      | 0.222       | 0.003       | 0.062       | 0.357       | 0.779       | 0.810       |
| <b>CD8+ T cells (%)</b>        |             |             |             |             |             |             |             |             |             |             |
| IL-2, mean□SD                  | 46.17±12.37 | 41.94±12.16 | 46.68±13.23 | 46.32±12.00 | 48.76±13.62 | 47.54±13.06 | 46.42±13.68 | 45.21±12.62 | 47.93±13.69 | 46.19±12.06 |
| Placebo, mean□SD               | 45.78±13.83 | 43.77±14.40 | 45.98±15.55 | 46.75±17.44 | 47.80±15.65 | 46.07±14.85 | 45.16±13.20 | 46.29±14.40 | 49.40±11.33 | 49.62±14.18 |
| P value                        | 0.774       | 0.550       | 0.856       | 0.824       | 0.912       | 0.742       | 0.740       | 0.712       | 0.795       | 0.438       |
| <b>NK cells (%)</b>            |             |             |             |             |             |             |             |             |             |             |
| IL-2, mean□SD                  | 6.48±4.85   | 10.40±7.13  | 7.99±5.68   | 10.51±6.09  | 9.44±4.52   | 12.07±8.01  | 10.20±8.05  | 9.13±5.83   | 8.93±6.24   | 7.28±4.15   |
| Placebo, mean□SD               | 6.49±6.02   | 5.66±4.98   | 6.22±6.63   | 6.38±6.79   | 5.98±6.22   | 6.80±6.42   | 5.44±4.47   | 6.32±6.43   | 6.35±5.30   | 6.30±5.31   |
| P value                        | 0.786       | 0.001       | 0.101       | 0.001       | 0.001       | 0.005       | 0.001       | 0.012       | 0.053       | 0.210       |
| <b>CD56bri in NK cells (%)</b> |             |             |             |             |             |             |             |             |             |             |
| IL-2, mean□SD                  | 6.68±4.45   | 13.19±8.82  | 7.58±5.53   | 10.89±6.93  | 6.40±4.46   | 10.40±6.49  | 6.54±4.07   | 6.03±4.40   | 5.55±4.25   | 6.70±5.46   |
| Placebo, mean□SD               | 8.10±6.99   | 9.15±8.86   | 7.89±7.70   | 6.18±5.66   | 7.70±6.81   | 6.56±4.65   | 7.43±5.67   | 7.90±6.74   | 7.98±6.07   | 9.41±7.53   |
| P value                        | 0.635       | 0.030       | 0.743       | 0.004       | 0.737       | 0.022       | 0.712       | 0.376       | 0.078       | 0.140       |
